# Supplementary material
Source: PubMed Central journal article supplement (PMC3635718)
Supplement: JCI64201sd.pdf [file JCI64201sd.pdf]

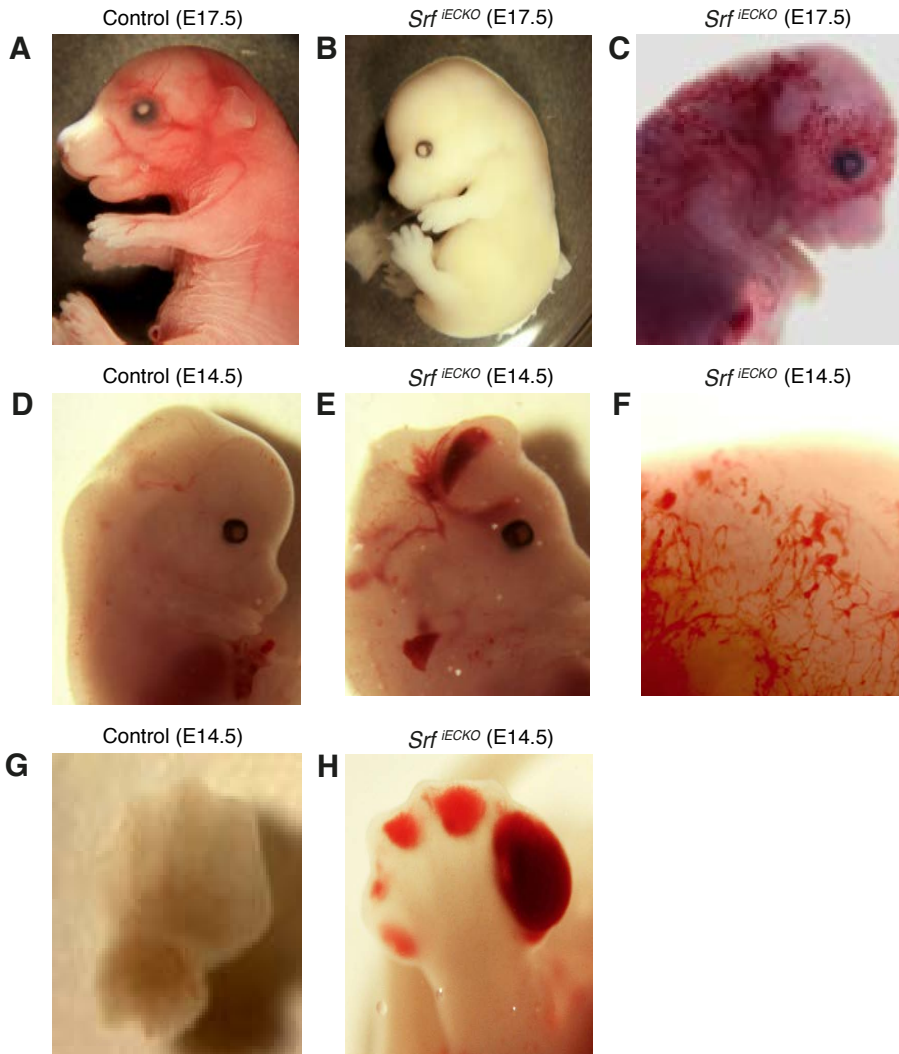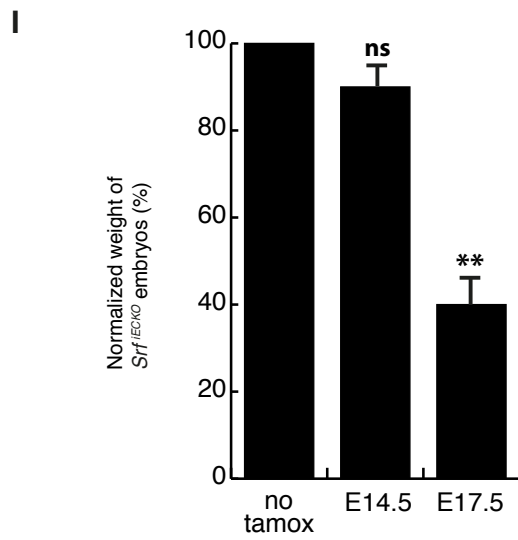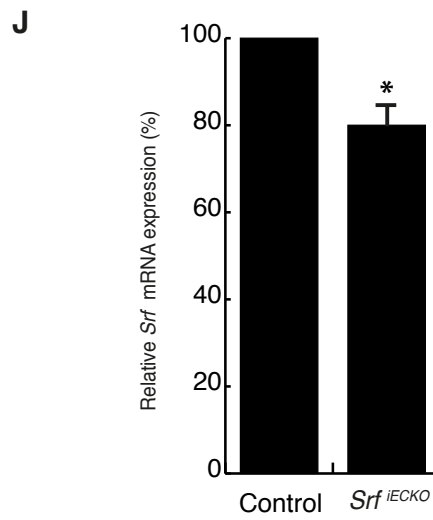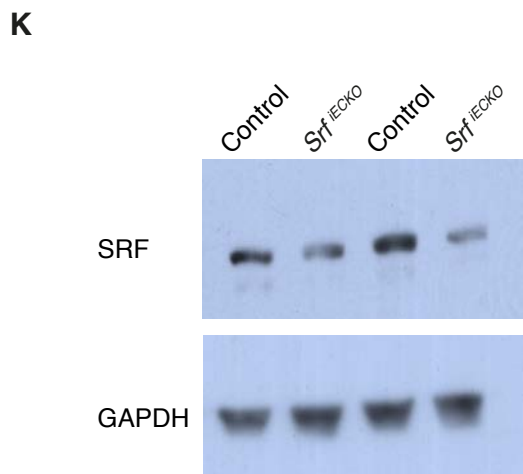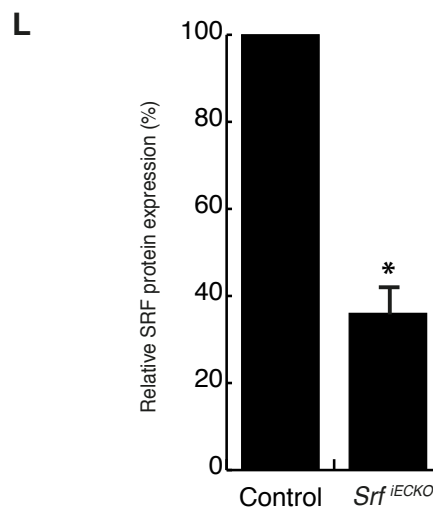

### Legend to Supplemental Figure 1.

Characterization of embryos after EC-specific *Srf* deletion. **(A)** E17.5 control embryo. **(B)** E17.5 *Srf*<sup>iECKO</sup> embryo, representing the majority (90%) of embryos being necrotic and smaller in size. **(C)** E17.5 *Srf*<sup>iECKO</sup> embryo, displaying a subset (10%) with abnormal vascularization. **(D)** E14.5 control embryo. **(E)** E14.5 *Srf*<sup>iECKO</sup> mutant embryo with hemorrhaging in the head region. **(F)** E14.5 mutant embryo with fragmented blood vessels in the head region. **(G)** E14.5 limb buds of a control embryo. **(H)** Higher magnification of blood pooling in limb buds of E14.5 *Srf*<sup>iECKO</sup> embryos. **(I)** E17.5 *Srf* knockout embryos show a significant weight reduction. Data shown are means +/- s.e.m. \*\*p<0,01 (n=6 each). **(J)** Semiquantitative RT-PCR analysis of *Srf* mRNA levels of embryonic limb buds (E14.5 control versus *Srf*<sup>iECKO</sup> embryos). *Srf* mRNA levels were calculated in relation to *Gapdh* and normalized to the control (100%). The data shown are means +/- s.e.m. \*p<0,05 (n=6 each). **(K)** Representative example of anti-SRF Western Blot analysis of embryonic limb bud tissues of pairs of control and *Srf*<sup>iECKO</sup> E14.5 embryos. SRF was detected by 2C5 antibody, GAPDH served as loading control. **(L)** Quantitation of Western blots (embryonic limb bud tissue; control and *Srf*<sup>iECKO</sup> E14.5). SRF protein levels were calculated relative to GAPDH and normalized to control (100%). Data shown are means +/- s.e.m. \*p<0,05 (n=3 each).

**A**

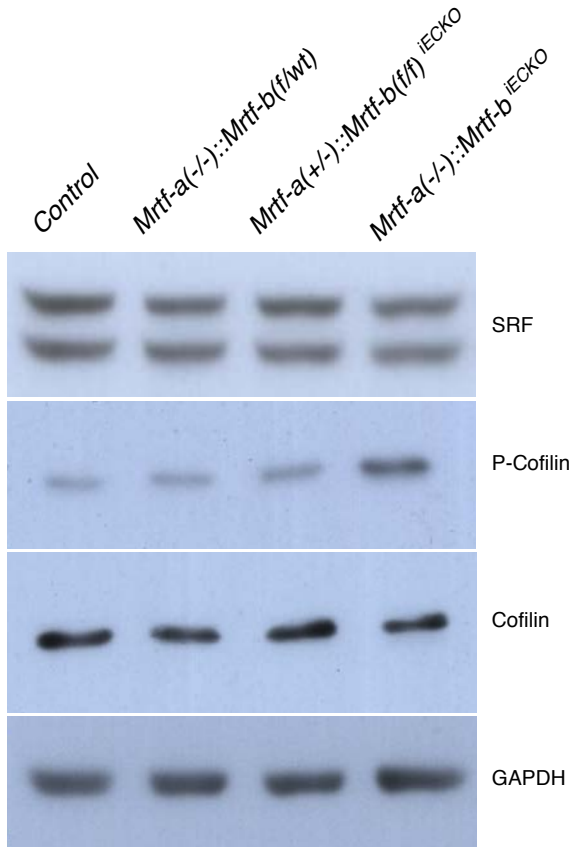

**B**

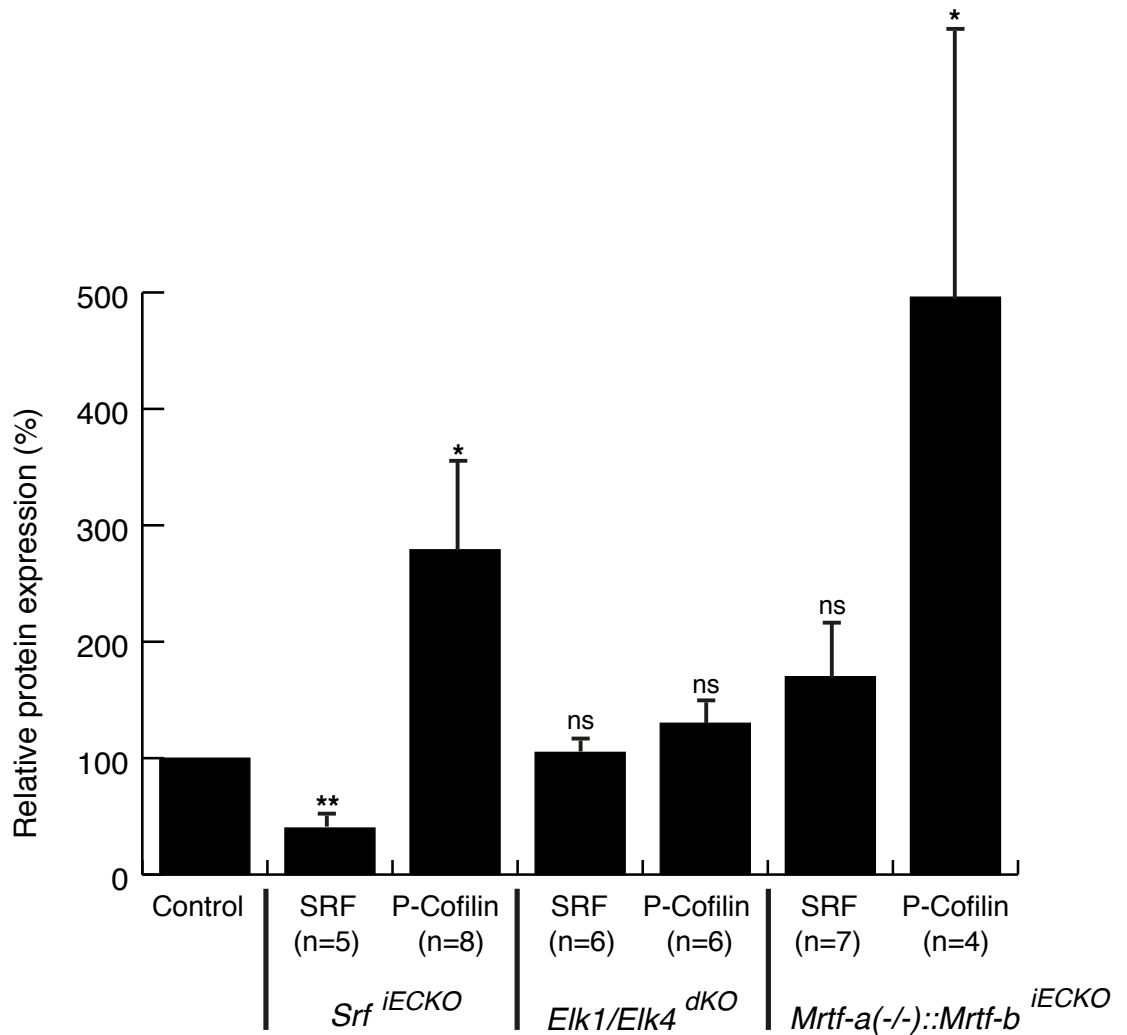

## Legend to Supplemental Figure 2.

Phosphorylation of cofilin is increased upon SRF and MRTF-A/B depletion.

(A) Representative Western blot of SRF and phospho-Cofilin (P-Cofilin) levels in *Mrtf-a(-/-)::Mrtf-b<sup>iECKO</sup>* whole retinal tissue (P8). Cofilin and GAPDH served as loading controls. Extracts from: Control (*Mrtf-a(+/-)::Mrtf-b(f/wt)*) (lane 1), *Mrtf-a(-/-)::Mrtf-b(f/wt)* (lane 2), *Mrtf-a(+/-)::Mrtf-b(f/f)<sup>iECKO</sup>* (lane 3), *Mrtf-a(-/-)::Mrtf-b<sup>iECKO</sup>* (lane 4). (B) Normalized quantification of Western blots of SRF and P-Cofilin levels in the different mutant mouse strains used in this study (*Srf<sup>iECKO</sup>*, *Elk1/Elk4<sup>dKO</sup>* and *Mrtf-a(-/-)::Mrtf-b(f/f)<sup>iECKO</sup>* mice). SRF protein levels are reduced in *Srf<sup>iECKO</sup>*, and unchanged in *Elk1/Elk4<sup>dKO</sup>* and *Mrtf-a(-/-)::Mrtf-b(f/f)<sup>iECKO</sup>* mice. P-Cofilin levels are increased in *Srf<sup>iECKO</sup>* and *Mrtf-a(-/-)::Mrtf-b(f/f)<sup>iECKO</sup>* mutants, but unchanged in *Elk1/Elk4<sup>dKO</sup>* mutants.

!

| <b>Genotype Comparison</b> | <b>t-test (p value)</b> | <b>Significance</b> |
|----------------------------|-------------------------|---------------------|
| 1 versus 2                 | 0,040                   | *                   |
| 1 versus 3                 | 0,0000044               | ***                 |
| 1 versus 4                 | 0,000047                | ***                 |
| 1 versus 5                 | 0,00068                 | ***                 |
| 1 versus 6                 | 0,00017                 | ***                 |
| 2 versus 3                 | 0,069                   | ns                  |
| 2 versus 4                 | 0,094                   | ns                  |
| 2 versus 5                 | 0,057                   | ns                  |
| 2 versus 6                 | 0,00035                 | ***                 |
| 3 versus 4                 | 0,84                    | ns                  |
| 3 versus 5                 | 0,65                    | ns                  |
| 3 versus 6                 | 0,0033                  | **                  |
| 4 versus 5                 | 0,58                    | ns                  |
| 4 versus 6                 | 0,0025                  | **                  |
| 5 versus 6                 | 0,0041                  | **                  |

### Legend to Supplemental Figure 3.

Statistical analysis of radial outgrowth of P8 retinae from Figure 9K. Genotypes analysed:

|             |                                                  |     |
|-------------|--------------------------------------------------|-----|
| Genotype 1: | <i>Mrtf-a(+/-)::Mrtf-b(f/x)</i>                  | n=8 |
| Genotype 2: | <i>Mrtf-a(-/-)::Mrtf-b(f/x)</i>                  | n=7 |
| Genotype 3: | <i>Mrtf-a(+/-)::Mrtf-b(f/wt)<sup>iECKO</sup></i> | n=5 |
| Genotype 4: | <i>Mrtf-a(-/-)::Mrtf-b(f/wt)<sup>iECKO</sup></i> | n=6 |
| Genotype 5: | <i>Mrtf-a(+/-)::Mrtf-b(f/f)<sup>iECKO</sup></i>  | n=5 |
| Genotype 6  | <i>Mrtf-a(-/-)::Mrtf-b<sup>iECKO</sup></i>       | n=6 |

x denotes either the *floxed* or the *wt* allele of *Mrtf-b*. Shown is the Student's t-test analysis including t-test p-values and significance levels for each genotype compared to each other.

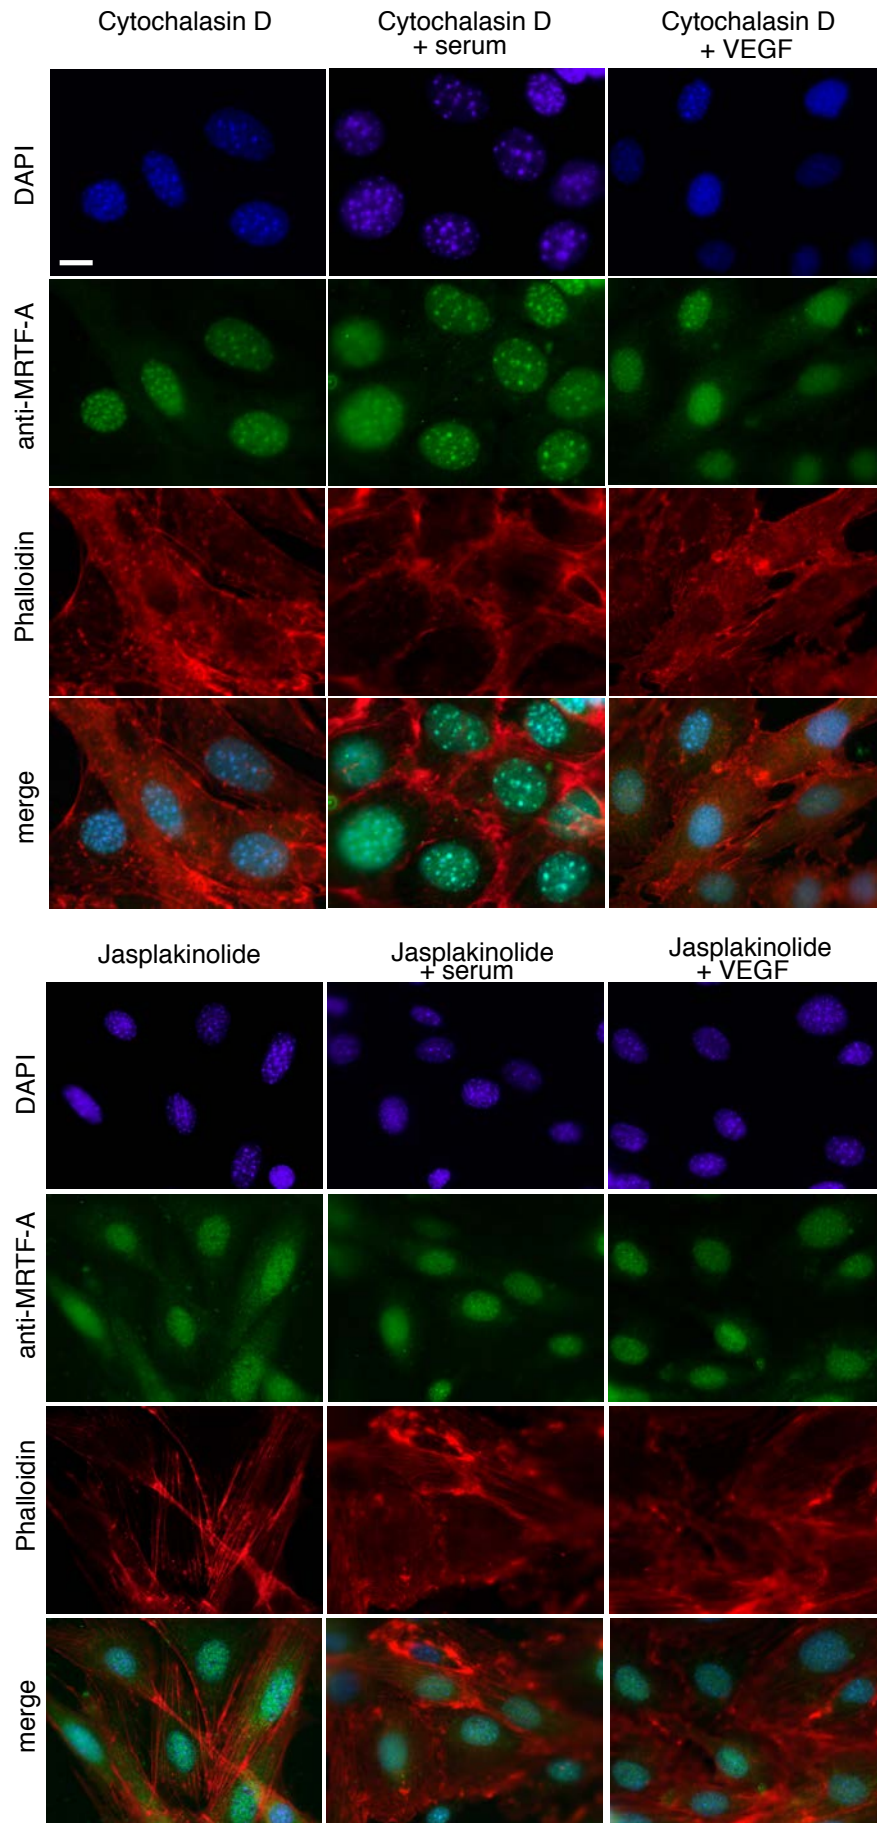

**Legend to Supplemental Figure 4.**

Nuclear localization of MRTF-A in mECs upon treatment with Cytochalasin D (30 minutes) and Jasplakinolide (2 hours). Subsequently, cells were additionally treated with serum (15% FCS for 1h) or VEGF-A (100 ng/ml for 1h), fixed and stained for cell nuclei (DAPI, blue), MRTF-A (green), and actin filaments (Phalloidin, red). Scale bar: 10  $\mu$ m.



## Primer Sequences for Genotyping

### SRF

5' GCTCGCAGCGGCGGCCAGATCTATAAC 3'

5' GCCTGCATTACCGGTTCGATGCAACGA 3'

5' CTTTCGCGCACACCAGGACACAGAGGAT 3'

### Elk4

5' GTGATGATGGTGGGATAGTGTATATCTGCAGGAGTG 3'

5' CCAGAGCCACTGAAGCTGTAAAGTAACTAGACTAAAC 3'

5' CTGCAGGAATTCGATATCAAGCTTGAAGTCC 3'

### mTmG

5' CTCTGCTGCCTCCTGGCTTCT 3'

5' CGAGGCGGATCACAAGCAATA 3'

5' TCACTGGGCGGGGGTCGTT 3'

### CRE

5' GCCTGCATTACCGGTTCGATGCXAACGA 3'

5' GTGGCAGATGGCGCGGCAACACC 3'

### MRTF-A

5' GTTGCTCAGTCATGTGACACCTGTACAG 3'

5' GGCTTCAGTACCTTCCTAAGCTCTGCAG 3'

5' CATGGTGGATCCTGAGACTGGCGAAT 3'

### MRTF-B

5' GGCTTAGACAAGATGGTTGGTCTGGCACTGCC 3'

5' CCAGTGGTGTCCAGTCTTACTGAACAGCTCACTGAG 3'

5' CATGGCGACTTCCTTCTCCTTCTCAAGGCTG 3'

## siRNA Sequences

### siGL2 siRNA (control)

sense: CGU ACG CGG AAU ACU UCG AdTdT

antisense: UCG AAG UAU UCC GCG UAC GdTdT

### siSRF siRNA

sense: GAU GGA GUU CAU CGA CAA CAA

antisense: GUU GUC GAU GAA CUC CAU CUU

## Primer Sequences for semiquantitative RT-PCR

Gapdh fw: TGG ATC TGA CGT GCC GC  
Gapdh rev: TGC CGT CTT CAC CAC CTT C

Srf fw: CAC GAC CTT CAG CAA GAG GAA  
Srf rev: CAA AGC CAG TGG CAC TCA TTC

Thrombospondin1 fw: TCG GCC TTT AAC GAA TGA GAA  
Thrombospondin1 rev: AGC GGG CAC CTT CCT AGT G

Cofilin fw: TCT GGG CCC CCG AGA AT  
Cofilin rev: TTG ATG GCA TCC TTG GAG C

$\beta$ -actin fw: AGA GAG GTA TCC TGA CCC TGA AGT  
 $\beta$ -actin rev: CAC GCA GCT CAT TGT AGA AGG TGT

c-fos fw CTT GCC CCT TCT CAA CGA  
c-fos rev: GCT CCA CGT TGC TGA TGC T

Opsin-1 fw: CAA GCC CTT TGG CAA TGT GA  
Opsin-1 rev: GCT CCA ACC AAA GAT TGG TGG

Rhodopsin fw: TCA TGG TCT TCG GAG GAT TCA C  
Rhodopsin rev: TCA CCT CCA AGT GTG GCA AAG

Vegf-r2 fw: GAT GCC CGA CTC CCT TTG A  
Vegf-r2 rev: CGA AAG ACC ACA CAT CGC TCT

Vegf-r1 fw: AGC CTA CCT CAC CGT GCA AG  
Vegf-r1 rev: AAA AGA GGG TCG CAG CCA C

VE-Cadherin fw: CCA TCT TCC TCT GCA TCC TC  
VE-Cadherin rev: CAA CTG CTCGTG AAT CTC CA

Vegf-a fw: TCA CCA AAG CCA GCA CAT AG  
Vegf-a rev: TTG ACC CTT TCC CTT TCC TC

Pak1 fw: GCCCTAACTGTAAAGGTCCTACCA  
Pak1 rev: GCCCATGTGTAAACGCCTG

## Amplification Protocols for Genotyping

| SRF                                                                                     | Elk4                                                                                   | CRE                                                                                 |
|-----------------------------------------------------------------------------------------|----------------------------------------------------------------------------------------|-------------------------------------------------------------------------------------|
| 94°C, 2 min<br>94°C, 30 sec<br>60°C, 30 sec<br>72°C, 30 sec<br>33 cycles<br>72°C, 7 min | 95°C, 3 min<br>95°C, 1 min<br>69°C, 1 min<br>72°C, 1 min<br>30 cycles<br>72°C, 10 min  | 94°C, 1 min<br>94°C, 45sec<br>70°C, 45sec<br>72°C, 1min<br>35 cycles<br>72°C, 10min |
| MRTF-A                                                                                  | MRTF-B                                                                                 | mTmG                                                                                |
| 94°C, 2 min<br>94°C, 30sec<br>62°C, 30 sec<br>72°C, 50 sec<br>40 cycles<br>72°C, 7 min  | 94°C, 2 min<br>94°C, 30sec<br>70°C, 40 sec<br>72°C, 50 sec<br>35 cycles<br>72°C, 7 min | 94°C, 3 min<br>94°C, 30sec<br>61°C, 1 min<br>72°C, 1min<br>35 cycles<br>72°C, 2 min |

## Amplification Protocol for semiquantitative RT-PCR

Segment 1: 50°C, 2 min  
 Segment 2: 95°C, 10 min  
 Segment 3: 95°C, 15 sec  
               60°C, 1 min  
               40 cycles

**Legend to Supplemental Table.**

Primer sequences and PCR amplification protocols.
